# Supplementary material for: S-25OHD Is Associated With Hand Grip Strength and Myopathy at 5 Years in Girls: An Odense Child Cohort Study
Source: Oxford University Press journal article supplement (doi:10.1210/jc.2018-00281), 2018-05-16
Supplement: jc.2018-00281.st1.pdf [file jc.2018-00281.st1.pdf]

## Supplemental Data

**Supplemental Table 1:** Continuous and categorical characteristics of non-participants (No available hand grip strength test measurement).

|                                  | Mean (SD) or median [IQR] or n (%) | Min-max     | P-value <sup>1</sup> |
|----------------------------------|------------------------------------|-------------|----------------------|
| n (%)                            |                                    |             |                      |
| - Total                          | 212                                |             | -                    |
| - Boys                           | 121 (57)                           |             |                      |
| - Girls                          | 91 (43)                            |             |                      |
| Age (years)                      | 5.0 [0.04]                         | 5.0-5.2     | 0.447                |
| Height (cm), n=206               |                                    |             | 0.444                |
| - Total                          | 111.7 (4.4)                        | 94.8-123.1  |                      |
| - Boys                           | 112.0 (4.1)                        | 103.0-123.0 |                      |
| - Girls                          | 111.4 (4.8)                        | 94.8-123.1  |                      |
| Weight (kg), n=196               |                                    |             | 0.755                |
| - Total                          | 19.32 (2.22)                       | 14.30-28.20 |                      |
| - Boys                           | 19.31 (2.18)                       | 14.85-25.85 |                      |
| - Girls                          | 19.32 (2.28)                       | 14.30-28.20 |                      |
| Triceps skinfold (mm), n=188     |                                    |             | 0.966                |
| - Total                          | 8.9 [2.5]                          | 5.4-20.5    |                      |
| - Boys                           | 8.4 [2.0]                          | 5.4-12.6    |                      |
| - Girls                          | 9.7 [2.7]                          | 6.0-20.5    |                      |
| Subscapular skinfold (mm), n=185 |                                    |             | 0.144                |
| - Total                          | 5.4 [1.5]                          | 3.4-15.3    |                      |
| - Boys                           | 5.1 [1.3]                          | 3.5-7.3     |                      |
| - Girls                          | 5.7 [1.5]                          | 3.4-15.3    |                      |
| Body fat (%), n=184              |                                    |             | 0.588                |
| - Total                          | 14.0 [3.3]                         | 8.4-28.5    |                      |
| - Boys                           | 13.4 [3.0]                         | 8.4-18.3    |                      |
| - Girls                          | 14.8 [3.7]                         | 9.5-28.5    |                      |
| BMI (kg/m <sup>2</sup> ), n=195  |                                    |             | 0.217                |
| - Total                          | 15.44 (1.22)                       | 13.00-20.50 |                      |
| - Boys                           | 15.37 (1.24)                       | 13.18-19.68 |                      |
| - Girls                          | 15.53 (1.21)                       | 13.00-20.50 |                      |
| Parents' education               |                                    |             | 0.943                |
| - Lower <sup>2</sup>             | 20 (13)                            |             |                      |
| - Intermediate <sup>3</sup>      | 81 (53)                            |             |                      |
| - Higher <sup>4</sup>            | 52 (34)                            |             |                      |
| Ethnicity                        |                                    |             | 0.135                |
| - Western <sup>5</sup>           | 207 (98)                           |             |                      |
| - Non-western                    | 5 (2)                              |             |                      |
| Vitamin D supplements            |                                    |             | 0.564                |
| - Yes                            | 92 (58)                            |             |                      |
| - No                             | 66 (42)                            |             |                      |
| Organized sports <sup>6</sup>    |                                    |             | <b>0.042</b>         |
| - Yes                            | 107 (68)                           |             |                      |
| - No                             | 51 (32)                            |             |                      |

<sup>1</sup>P-value from Mann-Whitney and student's t-test where appropriate for difference between

participants and non-participants. <sup>2</sup> High school or less. <sup>3</sup> High school + 1-3 years. <sup>4</sup> High school + 4

years or more. <sup>5</sup> European, American or Australian background. <sup>6</sup> At least once a week for the last year. Significant p-values in bold. Percentages may not add up due to rounding.

**Supplemental Table 2:** Hand grip strength reference values in percentiles.

|       | 10th | 25th | 50th | 75th | 90th | Mean (SD)   |
|-------|------|------|------|------|------|-------------|
| Girls | 6.2  | 7.1  | 8.1  | 9.2  | 10.2 | 8.11 (1.64) |
| Boys  | 6.4  | 7.7  | 8.6  | 9.8  | 11.0 | 8.76 (1.76) |
| Total | 6.3  | 7.3  | 8.4  | 9.5  | 10.7 | 8.44 (1.73) |

SD: Standard deviation.

**Supplemental Table 3:** Univariate associations with hand grip strength at five years for boys and girls separately and combined.

|                                                                           | Girls                     |                  | Boys                      |                  | All                        |                  |
|---------------------------------------------------------------------------|---------------------------|------------------|---------------------------|------------------|----------------------------|------------------|
|                                                                           | Coefficient<br>[95% CI]   | P-<br>value      | Coefficient<br>[95% CI]   | P-<br>value      | Coefficient<br>[95% CI]    | P-<br>value      |
| Height (cm)                                                               | 0.159<br>[0.127;0.191]    | <b>&lt;0.001</b> | 0.207<br>[0.173;0.242]    | <b>&lt;0.001</b> | 0.189<br>[0.165;0.212]     | <b>&lt;0.001</b> |
| Weight (kg)                                                               | 0.240<br>[0.180;0.300]    | <b>&lt;0.001</b> | 0.383<br>[0.319;0.447]    | <b>&lt;0.001</b> | 0.311<br>[0.267;0.356]     | <b>&lt;0.001</b> |
| Boy                                                                       | -                         | -                | -                         | -                | 0.645<br>[0.420;0.869]     | <b>&lt;0.001</b> |
| BMI (kg/m <sup>2</sup> )                                                  | 0.179<br>[0.056;0.301]    | <b>0.004</b>     | 0.404<br>[0.268;0.540]    | <b>&lt;0.001</b> | 0.266<br>[0.173;0.359]     | <b>&lt;0.001</b> |
| Triceps skinfold<br>(mm)                                                  | -0.040 [-<br>0.110;0.031] | 0.271            | 0.014 [-<br>0.067;0.095]  | 0.737            | -0.060 [-<br>0.111;-0.009] | <b>0.021</b>     |
| Body fat (%)                                                              | -0.009 [-<br>0.062;0.043] | 0.725            | 0.012 [-<br>0.045;0.069]  | 0.679            | -0.032 [-<br>0.070;0.005]  | 0.091            |
| Birth weight (kg)                                                         | 0.160 [-<br>0.181;0.502]  | 0.357            | 0.815<br>[0.481;1.149]    | <b>&lt;0.001</b> | 0.610<br>[0.371;0.849]     | <b>&lt;0.001</b> |
| Birth length (m)                                                          | 0.013 [-<br>0.025;0.051]  | 0.506            | 0.013 [-<br>0.017;0.043]  | 0.398            | 0.017 [-<br>0.007;0.041]   | 0.158            |
| Parental education<br>Intermediate <sup>1</sup> vs.<br>lower <sup>2</sup> | 0.189 [-<br>0.373;0.751]  | 0.509            | 0.573<br>[0.004;1.142]    | <b>0.048</b>     | 0.389 [-<br>0.016;0.795]   | 0.060            |
| Parental education<br>Higher <sup>3</sup> vs. lower<br>Examination        | 0.535 [-<br>0.047;1.116]  | 0.071            | 0.335 [-<br>0.276;0.947]  | 0.281            | 0.410 [-<br>0.017;0.837]   | 0.060            |
| season winter vs.<br>summer                                               | -0.047 [-<br>0.361;0.267] | 0.768            | -0.094 [-<br>0.425;0.236] | 0.575            | -0.073 [-<br>0.305;0.159]  | 0.537            |
| Ethnicity<br>Western <sup>4</sup> vs. non-<br>western                     | 0.535 [-<br>0.168;1.238]  | 0.135            | -0.122 [-<br>0.931;0.688] | 0.768            | 0.261 [-<br>0.282;0.803]   | 0.346            |
| Organized sports <sup>5</sup><br>Yes vs. no                               | 0.207 [-<br>0.203;0.618]  | 0.321            | 0.301 [-<br>0.110;0.712]  | 0.150            | 0.213 [-<br>0.080;0.506]   | 0.153            |
| Vitamin D<br>supplements<br>Yes vs. no                                    | -0.279 [-<br>0.620;0.062] | 0.109            | 0.048 [-<br>0.322;0.417]  | 0.800            | -0.128 [-<br>0.382;0.126]  | 0.324            |
| Smoking<br>Yes vs. no                                                     | 0.034 [-<br>0.631;0.698]  | 0.920            | -0.613 [-<br>1.399;0.173] | 0.126            | -0.299 [-<br>0.817;0.219]  | 0.258            |
| Parity<br>≥second birth vs.<br>first birth                                | -0.081 [-<br>0.392;0.230] | 0.608            | -0.236 [-<br>0.562;0.090] | 0.155            | -0.166 [-<br>0.395;0.063]  | 0.154            |

<sup>1</sup> High school + 1-3 years. <sup>2</sup> High school or less. <sup>3</sup> High school + 4 years or more. <sup>4</sup> European,

American or Australian background. <sup>5</sup> At least once a week for the last year. Significant p-values in bold.



**Supplemental Table 4:** Multivariate regression with complete observations for all variables in Model 2, split by sex.

|                        | <b>Girls</b>         |                  | <b>Boys</b>          |                  |
|------------------------|----------------------|------------------|----------------------|------------------|
|                        | Coefficient [95% CI] | P-value          | Coefficient [95% CI] | P-value          |
| <b>Model 1 (N=839)</b> |                      |                  |                      |                  |
| Height (cm)            | 0.135 [0.084;0.187]  | <b>&lt;0.001</b> | 0.110 [0.060;0.161]  | <b>&lt;0.001</b> |
| Weight (kg)            | 0.053 [-0.040;0.146] | 0.264            | 0.233 [0.139;0.326]  | <b>&lt;0.001</b> |

Significant p-values in bold.

**Supplemental Table 5:** Multivariate regression results predicting hand grip strength adjusted for parental education, stratified by sex.

|                                           | <b>Girls</b>           |                  | <b>Boys</b>            |                  |
|-------------------------------------------|------------------------|------------------|------------------------|------------------|
|                                           | Coefficient [95% CI]   | P-value          | Coefficient [95% CI]   | P-value          |
| <b>Model 1 Education</b>                  |                        |                  |                        |                  |
| Height (cm)                               | 0.113 [0.057;0.170]    | <b>&lt;0.001</b> | 0.097 [0.038;0.156]    | <b>0.001</b>     |
| Weight (kg)                               | 0.119 [0.016;0.222]    | <b>0.024</b>     | 0.252 [0.143;0.361]    | <b>&lt;0.001</b> |
| Intermediate vs. lower parental education | -0.044 [-0.554;0.466]  | 0.866            | 0.445 [-0.047;0.936]   | 0.076            |
| Higher vs. lower parental education       | 0.186 [-0.345;0.717]   | 0.492            | 0.296 [-0.233;0.825]   | 0.272            |
| <b>Model 2 Education</b>                  |                        |                  |                        |                  |
| Height (cm)                               | 0.041 [-0.024;0.106]   | 0.212            | 0.012 [-0.054;0.079]   | 0.716            |
| Weight (kg)                               | 0.320 [0.181;0.458]    | <b>&lt;0.001</b> | 0.476 [0.335;0.618]    | <b>&lt;0.001</b> |
| Body fat (%)                              | -0.140 [-0.209;-0.071] | <b>&lt;0.001</b> | -0.157 [-0.226;-0.088] | <b>&lt;0.001</b> |
| Intermediate vs. lower parental education | -0.069 [-0.572;0.435]  | 0.788            | 0.400 [-0.074;0.874]   | 0.098            |
| Higher vs. lower parental education       | 0.094 [-0.430;0.618]   | 0.725            | 0.246 [-0.265;0.757]   | 0.344            |
| <b>Model 3 Education</b>                  |                        |                  |                        |                  |
| Height (cm)                               | 0.069 [-0.013;0.152]   | 0.099            | 0.001 [-0.094;0.095]   | 0.987            |
| Weight (kg)                               | 0.319 [0.149;0.490]    | <b>&lt;0.001</b> | 0.515 [0.306;0.725]    | <b>&lt;0.001</b> |
| Body fat (%)                              | -0.160 [-0.245;-0.076] | <b>&lt;0.001</b> | -0.170 [-0.275;-0.066] | <b>0.002</b>     |
| 5-year vitamin D (nmol/L)                 | 0.011 [0.004;0.019]    | <b>0.004</b>     | 0.006 [-0.003;0.015]   | 0.182            |
| Intermediate vs. lower parental education | -0.135 [-0.814;0.543]  | 0.694            | 0.349 [-0.286;0.983]   | 0.279            |
| Higher vs. lower parental education       | 0.008 [-0.692;0.707]   | 0.982            | 0.373 [-0.302;1.049]   | 0.277            |

Significant p-values in bold. Higher: High school + 4 or more years. Intermediate: High school + 1-3 years. Lower: High school or less.

**Supplemental Table 6:** Univariate regression checking association between child s-25-hydroxyvitamin D at different time points and hand grip strength at 5 years.

|                                               | <b>Girls</b>              |         | <b>Boys</b>                |         | <b>All</b>                |         |
|-----------------------------------------------|---------------------------|---------|----------------------------|---------|---------------------------|---------|
|                                               | Coefficient<br>[95% CI]   | P-value | Coefficient<br>[95% CI]    | P-value | Coefficient<br>[95% CI]   | P-value |
| 5-year s-25OHD (nmol/L) (n=499)               | 0.009<br>[0.001;0.018]    | 0.030   | 0.005 [-<br>0.004;0.014]   | 0.274   | 0.008<br>[0.002;0.014]    | 0.012   |
| 5-year s-25OHD ≥50 vs. <50 nmol/L (n=499)     | 0.679<br>[0.206;1.151]    | 0.005   | 0.365 [-<br>0.170;0.900]   | 0.180   | 0.556<br>[0.197;0.916]    | 0.002   |
| 5-year s-25OHD vs. ≥75 vs. <50 nmol/L (n=343) | 0.774<br>[0.234;1.314]    | 0.005   | 0.432 [-<br>0.135;1.000]   | 0.135   | 0.651<br>[0.256;1.045]    | 0.001   |
| Cord s-25OHD (nmol/L)                         | 0.002 [-<br>0.006;0.009]  | 0.622   | -0.0002 [-<br>0.008;0.008] | 0.965   | 0.0005 [-<br>0.005;0.006] | 0.875   |
| Early pregnancy s-25OHD <sup>1</sup> (nmol/L) | -0.002 [-<br>0.012;0.008] | 0.660   | 0.001 [-<br>0.008;0.011]   | 0.790   | 0.0004 [-<br>0.007;0.007] | 0.903   |
| Late pregnancy s-25OHD <sup>2</sup> (nmol/L)  | -0.002 [-<br>0.009;0.005] | 0.505   | 0.004 [-<br>0.004;0.012]   | 0.294   | 0.001 [-<br>0.004;0.006]  | 0.758   |

<sup>1</sup> Gestational age (GA) <20 weeks, <sup>2</sup> GA ≥20 weeks. S-25OHD: Serum 25-hydroxyvitamin D.



**Supplemental Table 7:** Multivariate regression checking association between child s-25-hydroxyvitamin D (s-25OHD) at different time points and hand grip strength at 5 years, stratified by sex.

|                                         | Girls                  |                  | Boys                   |                  |
|-----------------------------------------|------------------------|------------------|------------------------|------------------|
|                                         | Coefficient [95% CI]   | P-value          | Coefficient [95% CI]   | P-value          |
| <b>Cord s-25OHD, n=735</b>              |                        |                  |                        |                  |
| Height (cm)                             | 0.10 [0.04;0.16]       | <b>0.001</b>     | 0.03 [-0.03;0.09]      | 0.341            |
| Weight (kg)                             | 0.13 [0.00;0.26]       | <b>0.050</b>     | 0.42 [0.30;0.55]       | <b>&lt;0.001</b> |
| Body fat (%)                            | -0.09 [-0.16;-0.02]    | <b>0.013</b>     | -0.16 [-0.22;-0.09]    | <b>0.001</b>     |
| Cord s-25OHD (nmol/L)                   | 0.00 [-0.00;0.01]      | 0.161            | 0.00 [-0.01;0.01]      | 0.978            |
| <b>Cord s-25OHD, n=432</b>              |                        |                  |                        |                  |
| Height (cm)                             | 0.149 [0.070;0.229]    | <b>&lt;0.001</b> | 0.001 [-0.084;0.086]   | 0.979            |
| Weight (kg)                             | 0.091 [-0.074;0.256]   | 0.280            | 0.475 [0.292;0.657]    | <b>&lt;0.001</b> |
| Body fat (%)                            | -0.091 [-0.179;-0.004] | <b>0.040</b>     | -0.181 [-0.276;-0.087] | <b>&lt;0.001</b> |
| 5-year s-25OHD (nmol/L)                 | 0.010 [0.001;0.018]    | <b>0.024</b>     | 0.005 [-0.003;0.014]   | 0.215            |
| Cord s-25OHD (nmol/L)                   | 0.004 [-0.005;0.014]   | 0.352            | -0.002 [-0.011;0.007]  | 0.685            |
| <b>Early s-25OHD<sup>1</sup>, n=497</b> |                        |                  |                        |                  |
| Height (cm)                             | 0.100 [0.022;0.179]    | <b>0.013</b>     | 0.049 [-0.023;0.122]   | 0.182            |
| Weight (kg)                             | 0.151 [-0.020;0.321]   | 0.083            | 0.406 [0.250;0.561]    | <b>&lt;0.001</b> |
| Body fat (%)                            | -0.095 [-0.176;-0.014] | <b>0.022</b>     | -0.147 [-0.234;-0.061] | <b>0.001</b>     |
| Early pregnancy s-25OHD (nmol/L)        | -0.002 [-0.011;0.007]  | 0.662            | -0.001 [-0.009;0.007]  | 0.835            |
| <b>Early s-25OHD, n=301</b>             |                        |                  |                        |                  |
| Height (cm)                             | 0.166 [0.067;0.265]    | <b>0.001</b>     | 0.009 [-0.091;0.109]   | 0.858            |
| Weight (kg)                             | 0.030 [-0.185;0.244]   | 0.786            | 0.481 [0.270;0.691]    | <b>&lt;0.001</b> |
| Body fat (%)                            | -0.050 [-0.153;0.052]  | 0.336            | -0.170 [-0.281;-0.058] | <b>0.003</b>     |
| 5-year s-25OHD (nmol/L)                 | 0.015 [0.006;0.025]    | <b>0.002</b>     | 0.006 [-0.004;0.015]   | 0.229            |
| Early pregnancy s-25OHD (nmol/L)        | 0.005 [-0.007;0.017]   | 0.391            | -0.003 [-0.014;0.008]  | 0.594            |
| <b>Late s-25OHD<sup>1</sup>, n=504</b>  |                        |                  |                        |                  |
| Height (cm)                             | 0.066 [-0.005;0.136]   | 0.069            | 0.046 [-0.025;0.117]   | 0.206            |
| Weight (kg)                             | 0.251 [0.095;0.406]    | <b>0.002</b>     | 0.397 [0.245;0.550]    | 0.397            |
| Body fat (%)                            | -0.119 [-0.196;-0.043] | <b>0.002</b>     | -0.122 [-0.200;-0.044] | -0.122           |
| Late pregnancy s-25OHD (nmol/L)         | 0.001 [-0.005;0.007]   | 0.825            | 0.003 [-0.003;0.010]   | <b>0.003</b>     |
| <b>Late s-25OHD, n=286</b>              |                        |                  |                        |                  |
| Height (cm)                             | 0.101 [0.008;0.195]    | <b>0.034</b>     | 0.023 [-0.079;0.125]   | 0.660            |
| Weight (kg)                             | 0.197 [-0.006;0.400]   | 0.057            | 0.468 [0.239;0.697]    | <b>&lt;0.001</b> |
| Body fat (%)                            | -0.105 [-0.202;-0.009] | <b>0.033</b>     | -0.139 [-0.258;-0.021] | <b>0.022</b>     |
| 5-year s-25OHD (nmol/L)                 | 0.010 [0.000;0.019]    | <b>0.041</b>     | 0.005 [-0.005;0.014]   | 0.327            |
| Late pregnancy s-25OHD (nmol/L)         | 0.002 [-0.006;0.010]   | 0.628            | 0.003 [-0.007;0.012]   | 0.551            |

Significant p-values in bold. <sup>1</sup> Gestational age (GA) <20 weeks, <sup>2</sup> GA ≥20 weeks. 95% CI: 95%

confidence interval. S-25OHD: Serum 25-hydroxyvitamin D.

**Supplemental Table 8:** Multivariate regression with complete observations for all variables in Model 3-5, stratified by sex.

|                        | <b>Girls</b>           |              | <b>Boys</b>            |                  |
|------------------------|------------------------|--------------|------------------------|------------------|
|                        | Coefficient [95% CI]   | P-value      | Coefficient [95% CI]   | P-value          |
| <b>Model 2 (n=493)</b> |                        |              |                        |                  |
| Height (cm)            | 0.107 [0.031;0.183]    | <b>0.006</b> | 0.021 [-0.059;0.101]   | 0.610            |
| Weight (kg)            | 0.195 [0.039;0.351]    | <b>0.014</b> | 0.455 [0.282;0.628]    | <b>&lt;0.001</b> |
| Body fat (%)           | -0.133 [-0.214;-0.051] | <b>0.002</b> | -0.158 [-0.249;-0.067] | <b>0.001</b>     |

Significant p-values in bold.
